# Supplementary material for: 4D Trajectory Planning of Aircraft Taxiing considering Time and Fuel
Source: Hindawi journal article supplement (doi:10.1155/2020/9603968), 2020-12-08
Supplement: f1 [file 9603968.f1.zip]

Archive with 3 entries (3 files):
- Supplementary file - attribute (1).xls
- supplementary file - distance (1).xls
- Supplementary file - fixed_data (1).xls
