# Supplementary material for: 4D Trajectory Planning of Aircraft Taxiing considering Time and Fuel
Source: Hindawi journal article supplement (doi:10.1155/2020/9603968), 2020-12-08
Supplement: f1 [file 9603968.f1.zip › Supplementary file - attribute (1).xls]

## Sheet: Sheet1
type	tow	engine	Number of engines	rated power F0（n）	The fuel flow（7%）kg/s	Fuel flow rate（30%）kg/s
B738	78245	CFM56-7B	2	242880	0.116	0.349	2
A320	77000	CFM56-5-A1	2	222400	0.1011	0.291
A321	93500	CFM56-5B1	2	266900	0.117	0.364
A319	75500	CFM56-5B1	2	266900	0.117	0.364
A320	77000	CFM56-5-A1	2	222400	0.1011	0.291
B738	78245	CFM56-7B	2	242880	0.116	0.349
