# Supplementary material for: 4D Trajectory Planning of Aircraft Taxiing considering Time and Fuel
Source: Hindawi journal article supplement (doi:10.1155/2020/9603968), 2020-12-08
Supplement: f1 [file 9603968.f1.zip › supplementary file - distance (1).xls]

## Sheet: Sheet1
1	22	13.335
2	23	13.335
3	10	18.9195
4	11	18.9994
5	31	13.335
6	12	18.9977
7	13	18.9977
8	39	13.335
9	40	13.335
10	14	15.5457
11	15	16.3472
12	16	12.3745
13	17	12.3745
14	26	5.7284
15	29	3.9514
16	33	5.1436
17	36	5.1426
18	25	2.5928
19	27	1.7598
20	35	8.6171
21	38	8.6171
22	1	13.335
22	23	6.6675
22	41	6.1736
23	22	6.6675
23	24	25.3294
23	42	6.1736
24	23	25.3294
24	25	2.6811
24	43	6.1736
25	24	2.6811
25	26	12.5952
26	25	12.5952
26	27	7.1261
27	26	7.1261
27	28	1.1279
28	27	1.1279
28	29	7.9022
28	30	32.3497
28	45	6.1736
29	28	7.9022
29	30	24.4475
30	28	32.3497
30	29	24.4475
30	31	22.0486
30	46	6.1736
31	30	22.0486
31	32	19.2264
31	47	6.1736
32	31	19.2264
32	33	4.1628
32	48	6.1736
33	32	4.1628
33	34	2.9633
34	33	2.9633
34	35	11.4653
34	49	6.1736
35	34	11.4653
35	36	9.3486
36	35	9.3486
36	37	10.4775
37	36	10.4775
37	38	3.9511
37	50	6.1736
38	37	3.9511
38	39	13.6878
39	38	13.6878
39	40	13.2292
39	51	6.1736
40	9	13.335
40	39	13.2292
40	52	6.1736
41	22	6.1736
41	42	6.6675
41	72	29.5628
42	23	6.1736
42	41	6.6675
42	43	25.3294
43	24	6.1736
43	42	25.3294
43	44	13.2644
44	43	13.2644
44	45	10.2658
44	56	18.9794
45	28	6.1736
45	44	10.2658
45	46	32.3497
45	58	11.3242
46	30	6.1736
46	45	32.3497
46	47	22.0486
46	59	11.3242
47	31	6.1736
47	46	22.0486
47	48	19.2264
47	60	11.3242
48	32	6.1736
48	47	19.2264
48	49	7.1261
48	61	11.3242
49	34	6.1736
49	48	7.1261
49	50	31.2914
50	37	6.1736
50	49	31.2914
50	51	17.6389
50	62	8.2522
51	39	6.1736
51	50	17.6389
51	52	13.2292
52	40	6.1736
52	51	13.2292
52	53	63.6764
52	63	10.3717
53	52	63.6764
53	54	29.0689
53	64	10.3717
54	53	29.0689
54	65	29.0689
55	56	7.5847
55	160	15.6192
56	44	18.9794
56	55	7.5847
56	57	10.2658
57	56	10.2658
57	58	7.6553
57	66	3.8806
58	45	11.3242
58	57	7.6553
58	170	12.3825
59	46	11.3242
59	165	9.1722
59	170	19.9672
60	47	11.3242
60	61	19.2264
60	67	7.6553
60	165	12.8764
61	48	11.3242
61	60	19.2264
61	169	3.8001
62	50	8.2522
63	52	10.3717
63	64	34.6075
64	53	10.3717
64	63	34.6075
64	65	10.3717
64	70	8.1492
65	54	29.0689
65	64	10.3717
65	71	8.1492
66	57	3.8806
66	69	2.6341
66	159	7.9486
67	60	7.6553
68	169	3.8552
69	66	2.6341
70	64	8.1492
70	71	29.0689
71	65	8.1492
71	70	29.0689
72	73	6.6675
72	74	39.2642
73	42	29.5628
73	72	6.6675
74	75	6.6675
74	77	16.1219
75	73	39.2642
75	74	6.6675
75	78	16.1219
77	78	6.6675
77	96	9.6661
78	75	16.1219
78	77	6.6675
78	79	5.9972
79	78	5.9972
79	80	8.3608
79	90	24.13
79	98	9.6661
80	79	8.3608
80	161	22.9306
81	82	13.0175
82	81	13.0175
82	83	8.3608
83	80	8.3608
83	82	8.3608
83	84	1.1994
84	83	1.1994
84	85	15.6633
84	90	8.3608
85	84	15.6633
85	86	9.2933
85	167	2.3636
86	85	9.2933
87	168	15.3258
88	102	27.3202
89	92	19.7355
90	79	24.13
90	84	8.3608
90	91	15.6633
90	99	9.6661
91	90	15.6633
91	166	6.1283
91	167	5.9972
92	89	19.7355
92	93	16.1925
92	103	7.5847
93	92	16.1925
94	162	9.1017
95	96	31.9617
95	105	6.5617
96	95	31.9617
96	97	6.6675
96	107	6.5617
97	78	9.6661
97	96	6.6675
97	98	5.9972
98	79	9.6661
98	97	5.9972
98	99	24.13
99	90	9.6661
99	98	24.13
99	100	15.6633
100	99	15.6633
100	101	21.5194
100	109	6.5617
100	166	3.5379
101	100	21.5194
101	102	21.5194
101	110	6.5617
101	168	11.9945
102	88	27.3202
102	101	21.5194
102	103	10.0894
102	111	6.5617
103	92	7.5847
103	102	10.0894
103	104	16.1925
103	112	6.5617
104	93	7.5847
104	103	16.1925
105	95	6.5617
105	106	13.335
105	118	6.6675
106	105	13.335
106	107	18.6267
106	119	6.6675
107	106	18.6267
107	108	6.6675
107	120	6.6675
108	97	6.5617
108	107	6.6675
108	109	45.7906
109	100	6.5617
109	108	45.7906
109	110	21.5194
109	124	6.6675
110	101	6.5617
110	109	21.5194
110	111	21.5194
110	126	6.6675
111	102	6.5617
111	110	21.5194
111	112	10.0894
111	129	6.6675
112	103	6.5617
112	111	10.0894
112	113	29.4922
112	131	6.6675
113	112	29.4922
113	134	6.6675
113	164	70.0969
114	117	13.335
114	135	6.6675
114	164	1.1994
117	114	13.335
117	136	6.6675
118	105	6.6675
118	119	13.335
118	137	12.6647
119	106	6.6675
119	118	13.335
119	120	18.6267
120	119	18.6267
120	121	6.6675
121	108	6.6675
121	120	6.6675
121	122	32.722
122	121	32.722
122	123	4.1786
123	122	4.1786
123	124	8.89
124	109	6.6675
124	123	8.89
124	125	21.5194
125	124	21.5194
125	126	1.031
126	110	6.6675
126	125	1.031
126	127	3.1698
127	126	3.1698
127	128	11.1882
128	127	11.1882
128	129	7.1614
129	111	6.6675
129	128	7.1614
129	130	0.9511
130	129	0.9511
130	131	6.1383
130	150	5.7731
131	112	6.6675
131	130	6.1383
131	132	5.0447
131	151	2.9017
132	131	5.0447
132	133	4.4803
132	152	4.441
133	132	4.4803
133	134	19.9672
133	152	8.6512
134	113	6.6675
134	133	19.9672
134	135	71.2964
135	114	6.6675
135	134	71.2964
135	136	13.335
136	117	6.6675
136	135	13.335
136	158	12.6647
137	118	12.6647
138	119	12.6647
139	122	8.3373
139	123	4.4499
140	124	5.1065
140	139	5.8023
141	140	5.268
142	141	18.9798
144	143	14.2639
144	145	2.4742
144	148	1.2682
145	146	4.2644
146	128	5.7842
146	147	6.7186
147	125	8.3518
147	127	4.4458
148	145	3.4872
149	148	3.4495
149	150	4.2956
150	151	5.3704
151	152	1.3788
153	148	15.5603
154	155	18.9636
155	156	5.0139
156	134	5.249
157	135	12.6647
158	136	12.6647
159	66	7.9486
160	55	15.6192
161	81	8.3608
162	94	9.1017
164	114	1.1994
164	115	12.1356
165	59	9.1722
165	60	12.8764
166	91	6.1283
166	100	3.5379
167	85	2.3636
167	91	5.9972
168	87	15.3258
168	101	11.9945
169	61	3.8001
169	68	3.8552
170	58	12.3825
170	59	19.9672
		4683.95
		=
